# Supplementary material for: Prognosis and Treatment Outcomes of Bone Metastasis in Gallbladder Adenocarcinoma: A SEER-Based Study
Source: MDPI journal article supplement (doi:10.3390/cancers15205055), 2023-10-19
Supplement: s1 [file s1]

SUPPLEMENTARY FILES

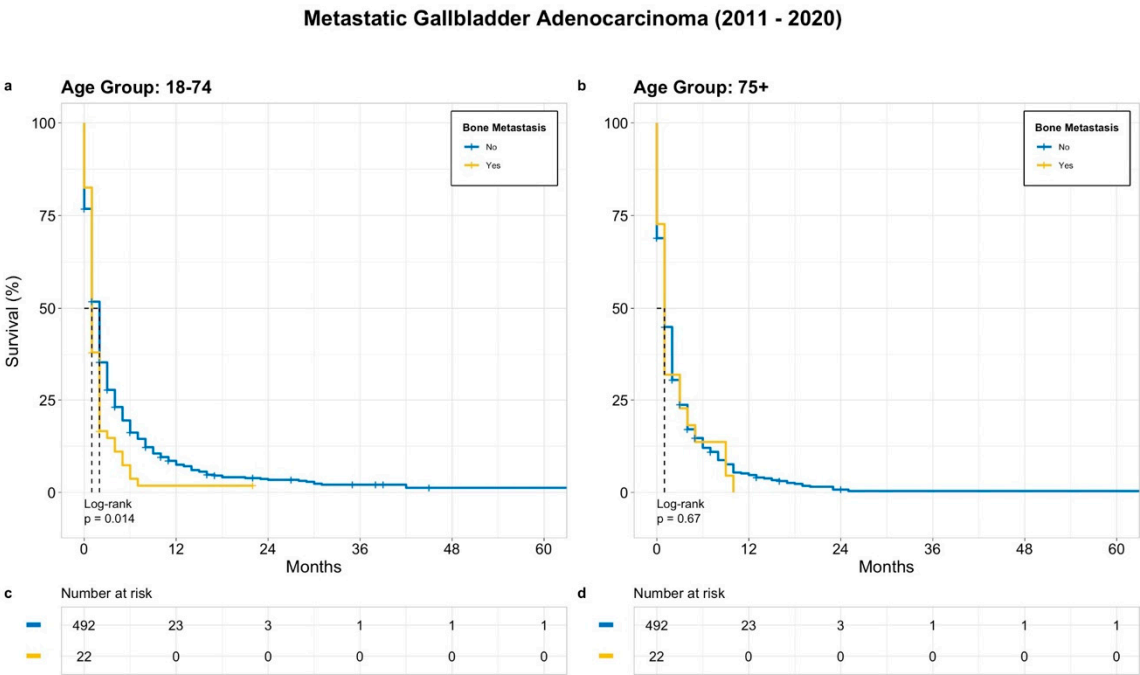

**Figure S1.** OS in patients with untreated metastatic GB adenocarcinoma based on bone metastasis; (a) age 18-74 years, (b) age 75+ years, (c,d) denotes patients at risk at a given time point.

# Metastatic Gallbladder Adenocarcinoma (2011 - 2020)

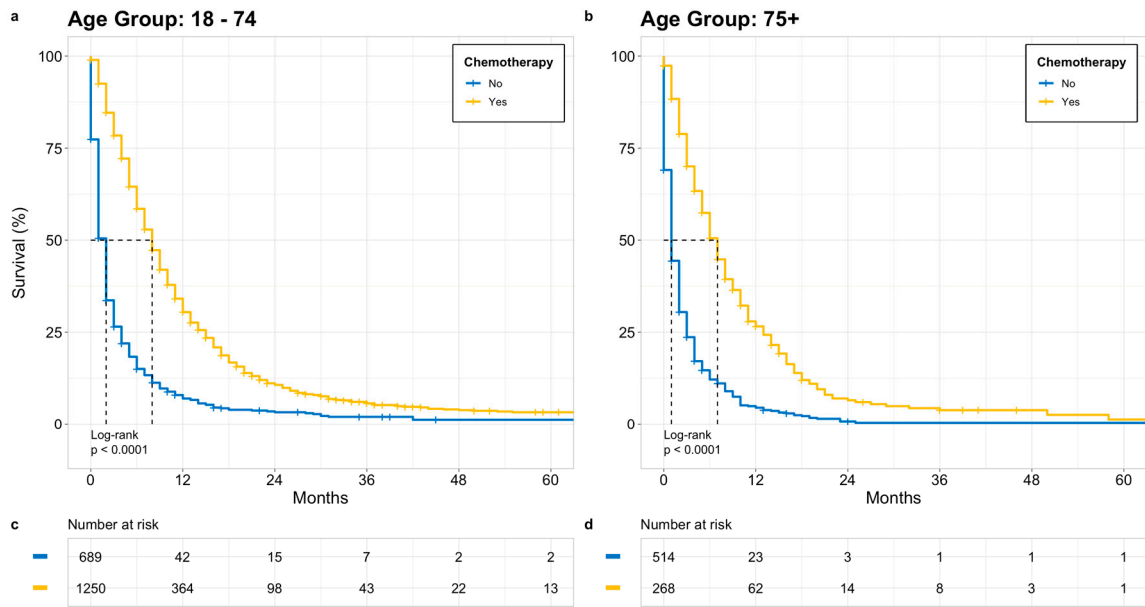

**Figure S2.** OS in patients with metastatic GBC based on receipt of chemotherapy; (a) age 18-74 years, (b) age 75+ years, (c,d) denotes patients at risk at a given time point.
